# Supplementary material for: Safety and efficacy of eculizumab for the prevention of antibody‐mediated rejection after deceased‐donor kidney transplantation in patients with preformed donor‐specific antibodies
Source: PubMed Central journal article supplement — Am J Transplant. 2019 May 24;19(10):2865–75. doi: 10.1111/ajt.15397 (PMC9328661; doi:10.1111/ajt.15397), 2019-05-24

**FIGURE S1** Rejection-free graft survival by rejection type through 36 months (A) Antibody-mediated rejection (grades I, II or III, according to central pathology biopsy reassessment), acute cellular rejection (biopsy-proven), graft loss or death; (B) Antibody-mediated rejection (grades I, II or III, according to central pathology biopsy reassessment), graft loss or death; (C) Acute cellular rejection (biopsy-proven), graft loss or death. A patient who did not die or experience rejection or graft loss was censored at the time of last contact.

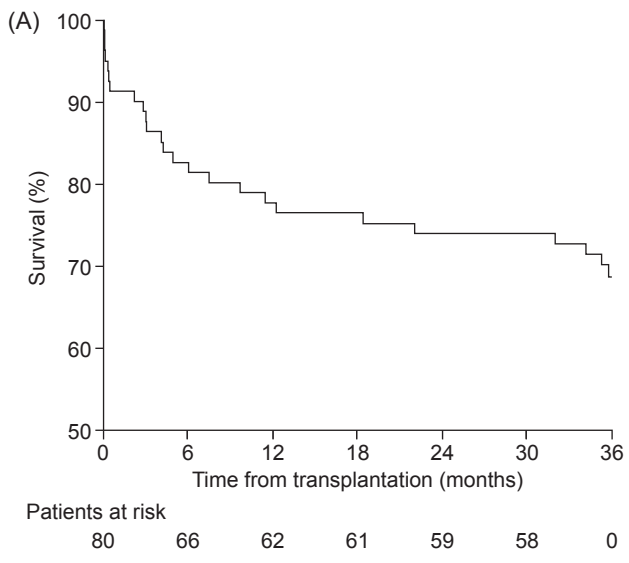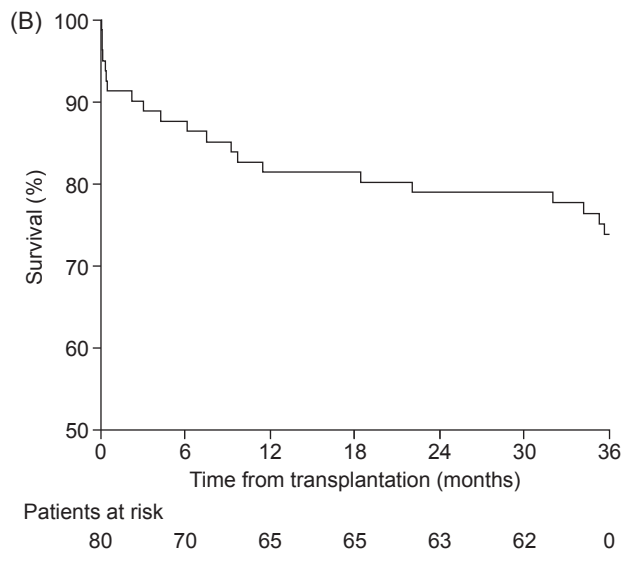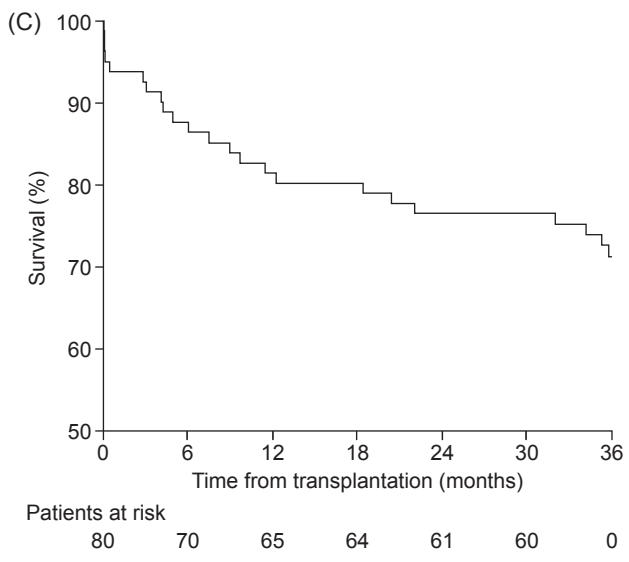

Supplement: AJT-19-2865-s008.pdf [file AJT-19-2865-s008.pdf]
